# Supplementary material
Source: publisher figshare collection journal article supplement (https://acs.figshare.com/ndownloader/files/5143768)
Supplement: Supplementary file 1 [file 5143768]

## Supporting Information

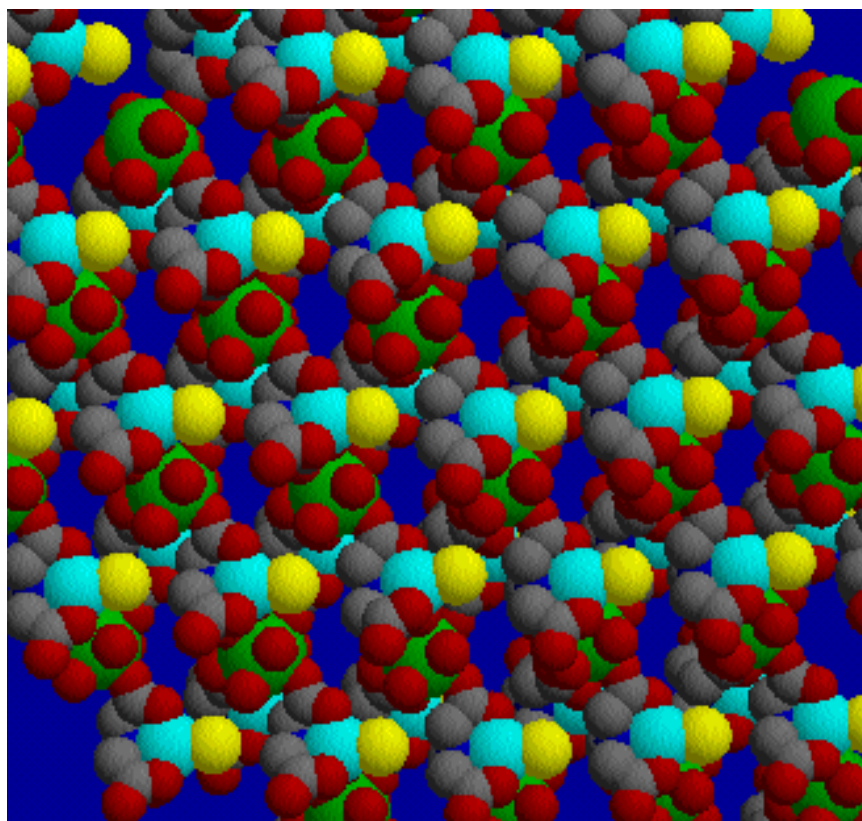

*S1.* Space-filling diagram showing the cavities. Cl yellow, Gd green, N blue, Cu turquoise

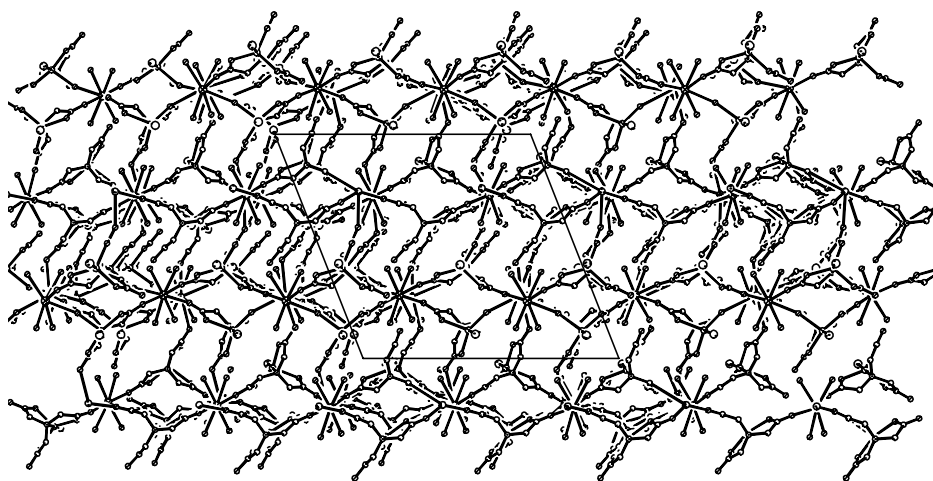

*S2.* Two-dimensional layered molecular structure of **1**, **2** and **3**. The alkaline metal ions are omitted for clarity.
